# Supplementary material
Source: PubMed Central journal article supplement (PMC4040977)
Supplement: NIHMS576356-supplement-Supp_FigureS1-S2.pdf [file NIHMS576356-supplement-Supp_FigureS1-S2.pdf]

## SUPPLEMENTARY FIGURE LEGENDS

**Figure S1.** Promoter sequences within genes described in this study for EMSA analysis and for construction of genomic mutants. The sequences contain the 21 nt ICE motif (shaded) flanked on each side by 12 nucleotides within each promoter. The underlined nucleotides represent substitutions made in oligonucleotides for EMSA or in the genome of mutant strains.  $P_{bfr}/ICE_{fhuE}$  denotes the *bfr* promoter sequence that contains the ICE motif of *fhuE*. The other heterologous promoter designations follow the same rule.

**Figure S2.** EMSA analysis of promoter sequences used to generate the binding curves show in Figure 2 of the main text. EMSA was carried out by titrating 0.1 nM radiolabeled promoter sequence DNA from (A) *bfr*, (B)  $P_{bfr}/ICE_{fhuE}$ , (C)  $P_{fhuE}/ICE_{bfr}$  and (D) *fhuE* with increasing concentrations of purified Irr. Bound and unbound DNA was resolved on a 5% non-denaturing polyacrylamide gel and visualized by autoradiography. Autoradiographs were scanned, and bands were quantified to determine bound and unbound DNA.

|                                            |                                                |
|--------------------------------------------|------------------------------------------------|
| <i>bfr</i>                                 | GATCCTAAACCGAATTTAGAACGCTTCTAAATGAGTTTACGGAAG  |
| <i>fhuE</i>                                | GCATGGGCTCCGGATTTGGAATCCTTCTAGACGAACACGATCGAT  |
| <i>P<sub>bfr</sub>/ICE<sub>fhuE</sub></i>  | GATCCTAAACCGGATTTGGAATCCTTCTAGACGAGTTTACGGAAG  |
| <i>P<sub>fhuE</sub>/ICE<sub>bfr</sub></i>  | GCATGGGCTCCGAATTTAGAACGCTTCTAAATGAACACGATCGAT  |
| <i>blr7895</i>                             | GGCGGCCTATATAATTTAGAAATCATTCTAAACTAGTGGGACAGGG |
| <i>bl17968</i>                             | CGCGTCCATCCGCGCTTAGAACCATTC AACACTAGAGGGATTCAA |
| <i>P<sub>7985</sub>/ICE<sub>7968</sub></i> | GGCGGCCTATATCGCTTAGAACCATTC AACACTAGTGGGACAGGG |
| <i>P<sub>7968</sub>/ICE<sub>7895</sub></i> | CGCGTCCATCCGAATTTAGAAATCATTCTAAACTAGAGGGATTCAA |
| <i>leuC</i>                                | CCCTGCTATATATTCTTGGAAATGTTTCCAGATCTGACCAGTCTCG |
| <i>hemB</i>                                | ACCATGCGAGCTGGTATAAGAATAATTCAGCCGGAGGAAGAGTG   |

**Figure S1**

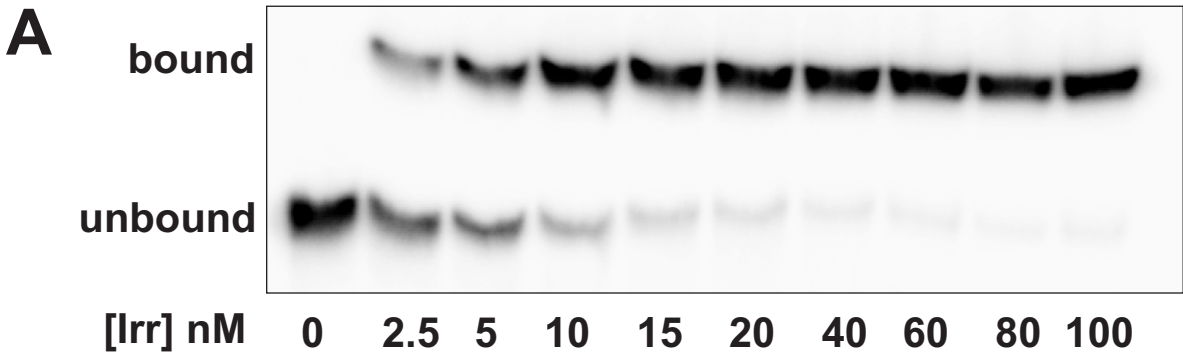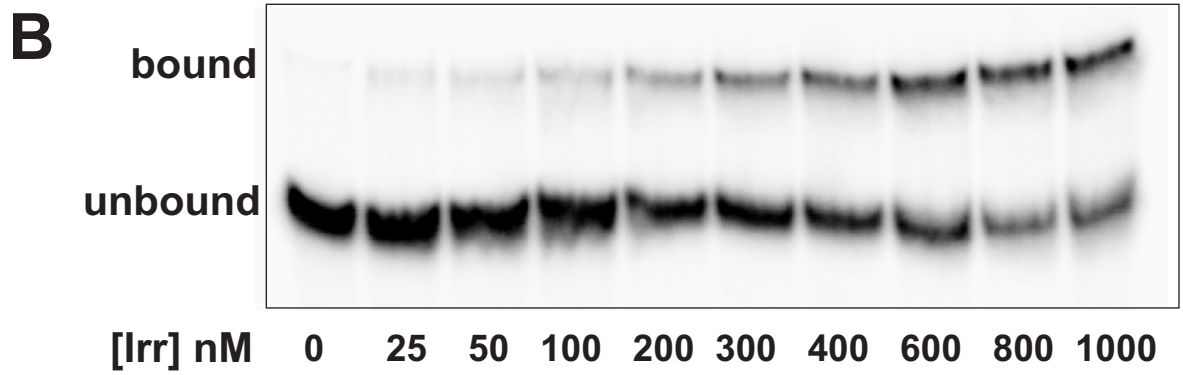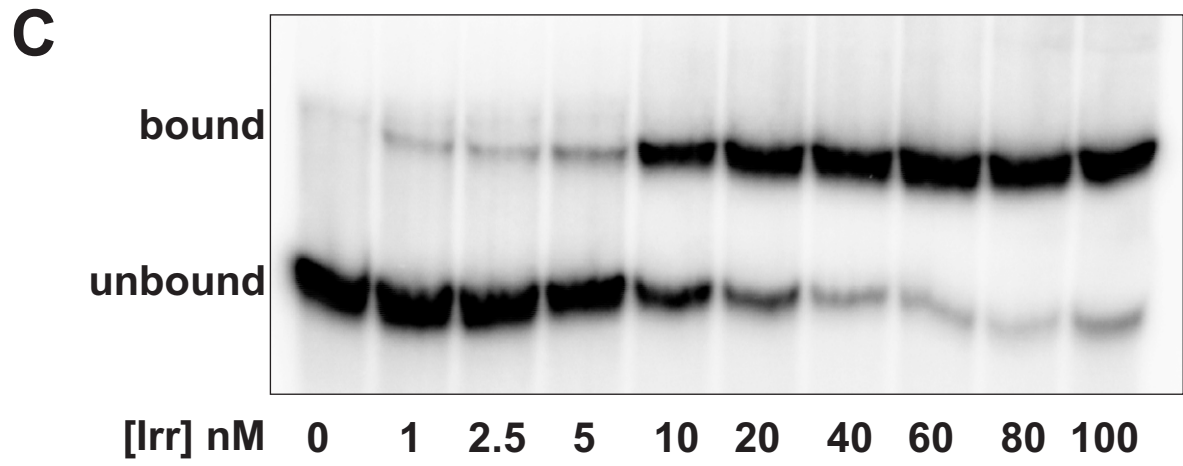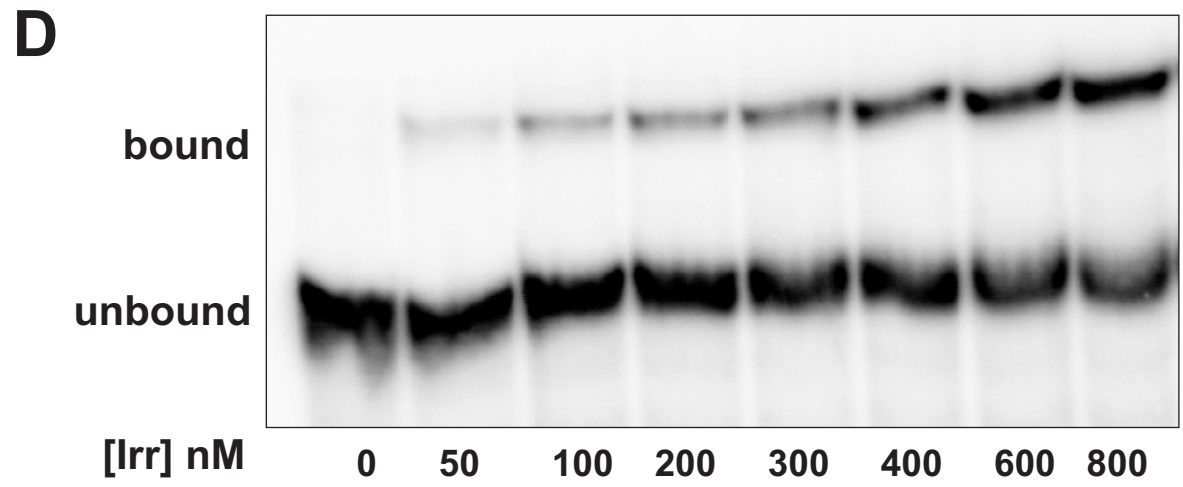

**Figure S2**
